# Supplementary material for: Assembling γ-graphyne surrounding TiO2 nanotube arrays: an efficient p–n heterojunction for boosting photoelectrochemical water splitting
Source: Royal Society of Chemistry journal article supplement (doi:10.1039/d1dt01810h), 2021-01-01
Supplement: d1dt01810h1.pdf [file d1dt01810h1.pdf]

## Supporting Information

### **Assembling $\gamma$ -graphyne surrounding TiO<sub>2</sub> nanotube arrays: An efficient p-n heterojunction for boosting photoelectrochemical water splitting**

*Dong Qiu, Chengli He, Yuxuan Lu, Qiaodan Li, Yang Chen\*, Xiaoli Cui\**

Department of Materials Science, Fudan University, Shanghai 200433, P. R. China

\*Corresponding author, E-mail: yangchen@fudan.edu.cn, xiaolicui@fudan.edu.cn

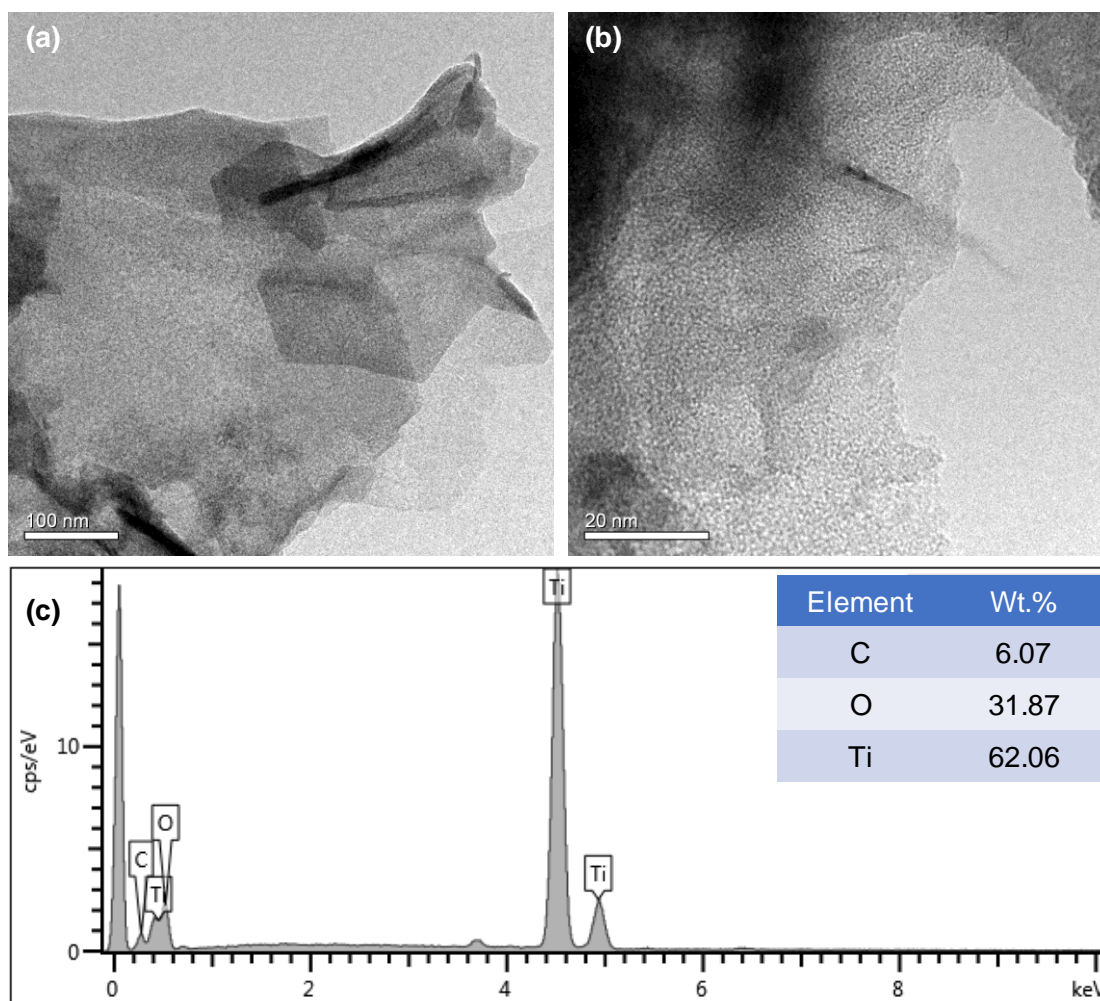

**Figure S1** (a, b) TEM images of  $\gamma$ -graphyne. (c) EDS spectrum of 0.3GY/TiO<sub>2</sub>.

**Note:** The detected carbon content in 0.3GY/TiO<sub>2</sub> is 6.07% (Fig. S1c), which contains non-negligible surface carbon contaminations. The content of carbon contaminations is estimated to be  $3.5 \pm 1.6\%$ <sup>1,2</sup>. Considering  $\gamma$ -graphyne as an all-carbon material ignoring a few surficial oxygen-containing groups, the content of  $\gamma$ -graphyne in 0.3GY/TiO<sub>2</sub> is approximately 2.6 wt.%.

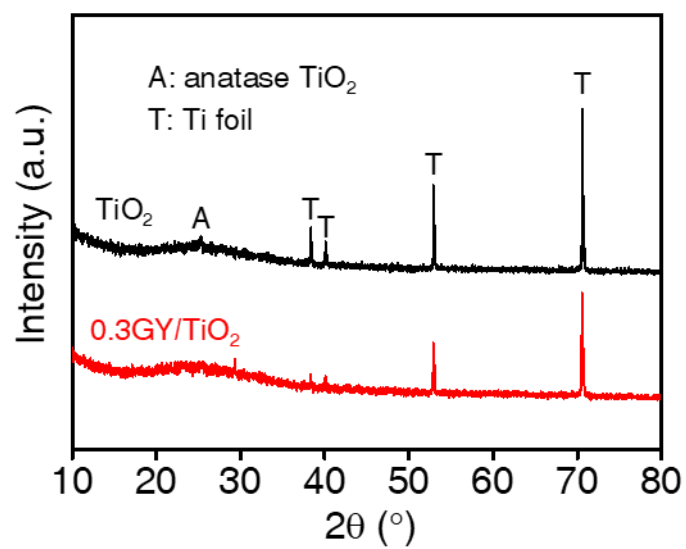

**Figure S2** XRD patterns of  $\text{TiO}_2$  and  $0.3\text{GY}/\text{TiO}_2$ .

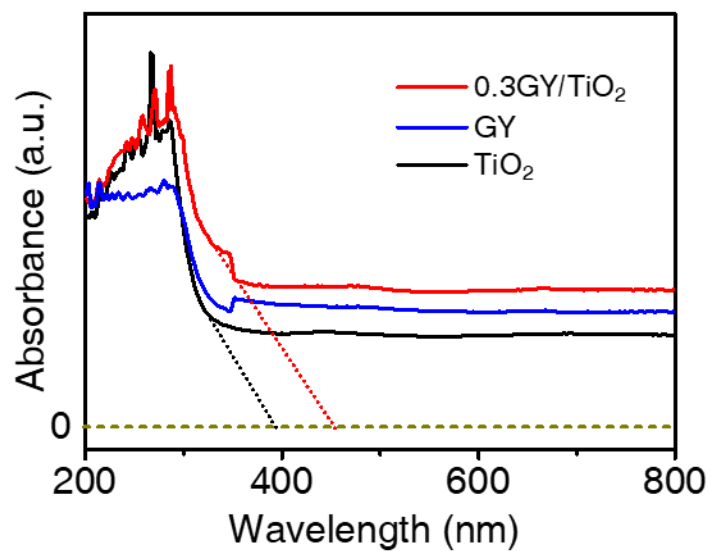

**Figure S3** UV-vis absorbance spectra of  $\text{TiO}_2$ , GY and  $0.3\text{GY}/\text{TiO}_2$ .

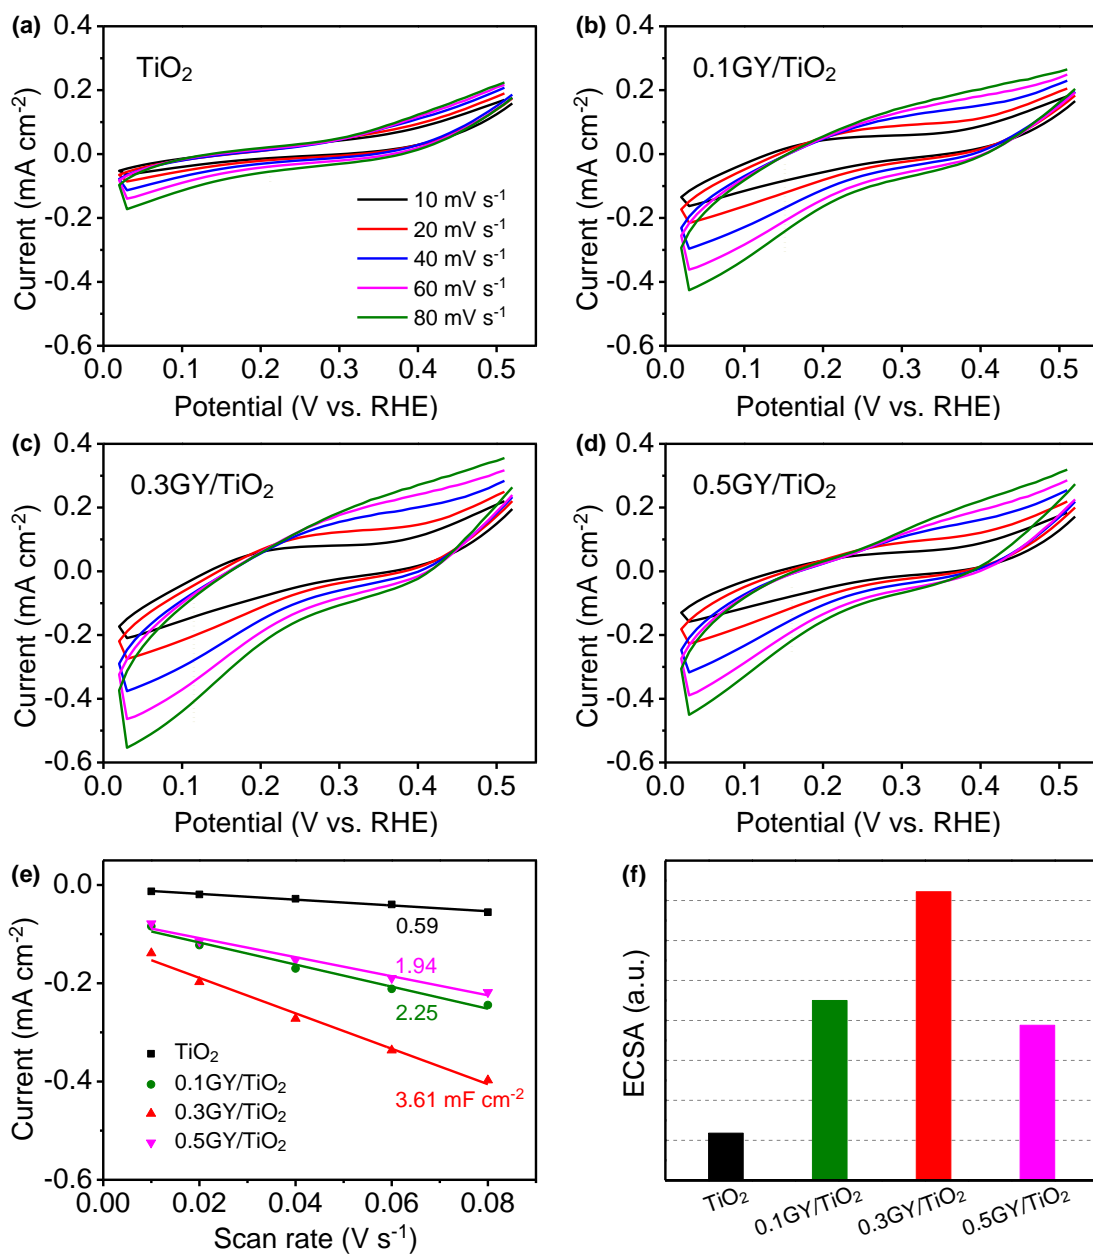

**Figure S4** (a-d) Cyclic voltammograms at various scan rates and (e) corresponding  $i$  (cathodic current at  $V_{oc}$  in Figure 5c)  $-v$  (scan rate) curves. (f) Relative ECSA of TiO<sub>2</sub> and GY/TiO<sub>2</sub>.

**Table S1** The photocurrent response of representative TiO<sub>2</sub>-based photoanodes.

| Photoanodes                                                                | Electrolyte                           | Light intensity (mW cm <sup>-2</sup> ) | Light source                            | Max. light absorption (nm) | Photo-current density (mA cm <sup>-2</sup> ) | Max. ABPE (%)   | Refs.               |
|----------------------------------------------------------------------------|---------------------------------------|----------------------------------------|-----------------------------------------|----------------------------|----------------------------------------------|-----------------|---------------------|
| <b>Alkaline</b>                                                            |                                       |                                        |                                         |                            |                                              |                 |                     |
| B-doped TiO <sub>2</sub>                                                   | 1 M KOH                               | 200                                    | 35 W Xe lamp                            | 443                        | 1.20 at 1.62 V                               | 0.12 at 1.62 V  | <sup>3</sup> /2019  |
| S, W-codoped TiO <sub>2</sub>                                              | 1 M KOH                               | 200                                    | 35 W Xe lamp                            | /                          | 0.12 at 1.42 V                               | /               | <sup>4</sup> /2020  |
| TiO <sub>2</sub> /Au/P-doped g-C <sub>3</sub> N <sub>4</sub>               | 1 M KOH                               | 100                                    | 300 W Xe lamp, AM 1.5G filter           | 530                        | 2.03 at 1.23 V                               | 0.68 at 0.70 V  | <sup>5</sup> /2021  |
| TiO <sub>2</sub> nanorod array/carbon quantum dots                         | 1 M KOH                               | 100                                    | 300 W Xe lamp, AM 1.5G filter           | /                          | 3.0 at 1.23 V                                | 1.29 at 0.62 V  | <sup>6</sup> /2019  |
| TiO <sub>2</sub> nanorod array/carbon dots/g-C <sub>3</sub> N <sub>4</sub> | 1 M KOH                               | 100                                    | 500 W Xe lamp, AM 1.5G filter           | /                          | 1.43 at 1.23 V                               | 0.69 at 0.59 V  | <sup>7</sup> /2020  |
| S-doped TiO <sub>2</sub> nanotube array/g-C <sub>3</sub> N <sub>4</sub>    | 1 M KOH                               | 100                                    | 500 W Xe lamp, AM 1.5G filter           | 486                        | 1.80* at 0.65 V                              | 1.47* at 0.65 V | <sup>8</sup> /2020  |
| TiO <sub>2</sub> nanotube/graphene/CNT                                     | 1 M KOH                               | 200                                    | 35 W Xe lamp                            | /                          | 0.13* at 1.62 V                              | /               | <sup>9</sup> /2021  |
| <b>Neutral</b>                                                             |                                       |                                        |                                         |                            |                                              |                 |                     |
| TiO <sub>2</sub> /g-CN                                                     | 0.5 M Na <sub>2</sub> SO <sub>4</sub> | 100                                    | 150 W Xe lamp, AM 1.5G filter           | 435                        | 0.91 at 1.23 V                               | 0.33 at 0.64 V  | <sup>10</sup> /2020 |
| TiO <sub>2</sub> /N-doped carbon dots                                      | 0.2 M Na <sub>2</sub> SO <sub>4</sub> | 100                                    | SLB-150B solar simulator, 420 nm filter | 425                        | 0.15 at 0.3 V                                | /               | <sup>11</sup> /2020 |
| TiO <sub>2</sub> /g-C <sub>3</sub> N <sub>4</sub> /CNT                     | 0.5 M Na <sub>2</sub> SO <sub>4</sub> | 100                                    | 150 W white lamp, 400 nm filter         | 428                        | 2.94 at 1.23 V                               | /               | <sup>12</sup> /2020 |

|                                                                          |                                       |     |                               |     |                 |                |                     |
|--------------------------------------------------------------------------|---------------------------------------|-----|-------------------------------|-----|-----------------|----------------|---------------------|
| TiO <sub>2</sub> nanorod array/N-doped C/g-C <sub>3</sub> N <sub>4</sub> | 0.1 M Na <sub>2</sub> SO <sub>4</sub> | 100 | 300 W LED lamp, 420 nm filter | 508 | 0.64 at 2.11 V  | /              | <sup>13</sup> /2020 |
| TiO <sub>2</sub> nanotube array/carbon dots                              | 0.1 M PBS**                           | /   | 300 W Xe lamp, 380 nm filter  | /   | 0.05 at 1.03 V  | /              | <sup>14</sup> /2019 |
| TiO <sub>2</sub> nanotube array/g-C <sub>3</sub> N <sub>4</sub>          | 0.1 M Na <sub>2</sub> SO <sub>4</sub> | /   | 300 W Xe lamp, 420 nm filter  | 800 | 0.72 at 1.23 V  | /              | <sup>15</sup> /2018 |
| TiO <sub>2</sub> nanotube array/g-C <sub>3</sub> N <sub>4</sub>          | 1 M Na <sub>2</sub> SO <sub>4</sub>   | 100 | 300 W Xe lamp, AM 1.5G filter | 450 | 0.14 at 1.61 V  | /              | <sup>16</sup> /2020 |
| TiO <sub>2</sub> nanotube array/graphyne                                 | 0.5 M Na <sub>2</sub> SO <sub>4</sub> | /   | 500 W Xe lamp                 | 516 | 4.36 at 0.93 V  | 3.15 at 0.93 V | <sup>17</sup> /2021 |
| TiO <sub>2</sub> nanotube array                                          | 0.5 M Na <sub>2</sub> SO <sub>4</sub> | /   | 500 W Xe lamp                 | 415 | 3.33* at 0.93 V | 2.28 at 0.93 V | <sup>17</sup> /2021 |
| TiO <sub>2</sub> nanotube array/graphyne                                 | 0.5 M Na <sub>2</sub> SO <sub>4</sub> | 100 | 300 W Xe lamp                 | 458 | 0.73 at 1.23 V  | 0.35 at 0.55 V | This work           |

Note: All potentials are converted to versus reversible hydrogen electrode (vs. RHE).

\*Estimated data according to the figures.

\*\*PBS: phosphate buffered saline.

**Table S2** The fitting values of the equivalent circuit model in Figure 6c.

| Samples                | $R_s$ ( $\Omega$ ) | $CPE$ (F)            | $CPE$ exponent | $R_{ct}$ ( $k\Omega$ ) |
|------------------------|--------------------|----------------------|----------------|------------------------|
| TiO <sub>2</sub>       | 8.0                | $3.2 \times 10^{-5}$ | 0.73           | 10.1                   |
| 0.1GY/TiO <sub>2</sub> | 4.8                | $6.4 \times 10^{-5}$ | 0.64           | 8.6                    |
| 0.3GY/TiO <sub>2</sub> | 4.8                | $9.4 \times 10^{-5}$ | 0.63           | 6.1                    |
| 0.5GY/TiO <sub>2</sub> | 7.3                | $4.8 \times 10^{-5}$ | 0.72           | 7.4                    |

## References

1. E. Liu, X. Zhang, P. Xue, J. Fan and X. Hu, *Int. J. Hydrogen Energy*, 2020, **45**, 9635-9647.
2. J. Qin, Z. Cao, H. Li and Z. Su, *Surf. Coat. Technol.*, 2021, **405**, 126661.
3. M. M. Momeni, M. Taghinejad, Y. Ghayeb, R. Bagheri and Z. Song, *J. Iran. Chem. Soc.*, 2019, **16**, 1839-1851.
4. M. M. Momeni, M. Akbarnia and Y. Ghayeb, *Int. J. Hydrogen Energy*, 2020, **45**, 33552-33562.
5. W. Kong, X. Zhang, Y. Guo, G. He, H. Liu, S. Zhang and B. Yang, *Electrochim. Acta*, 2021, **376**, 138036.
6. Z. Liang, H. Hou, Z. Fang, F. Gao, L. Wang, D. Chen and W. Yang, *ACS Appl. Mater. Interfaces*, 2019, **11**, 19167-19175.
7. W. Kong, X. Zhang, B. Chang, Y. Guo, Y. Li, S. Zhang and B. Yang, *ChemElectroChem*, 2020, **7**, 792-799.
8. S. Zhou, S. Liu, K. Su and K. Jia, *J. Electroanal. Chem.*, 2020, **862**, 114008.
9. H. Tavakol, M. M. Momeni and B. Mohammadi, *Environ. Prog. Sustainable Energy*, 2021, **40**, e13613.
10. L. Wang, R. Wang, L. Feng and Y. Liu, *J. Am. Ceram. Soc.*, 2020, **103**, 6272-6279.
11. H. Luo, S. Dimitrov, M. Daboczi, J.-S. Kim, Q. Guo, Y. Fang, M.-A. Stoeckel, P. Samorì, O. Fenwick, A. B. Jorge Sobrido, X. Wang and M.-M. Titirici, *ACS Appl. Nano Mater.*, 2020, **3**, 3371-3381.
12. D. Chaudhary, S. Kumar and N. Khare, *Int. J. Hydrogen Energy*, 2020, **45**, 30091-30100.
13. K. Huang, C. Li, X. Zhang, X. Meng, L. Wang, W. Wang and Z. Li, *Appl. Surf. Sci.*, 2020, **518**, 146219.
14. C. He, L. Peng, L. Lv, Y. Cao, J. Tu, W. Huang and K. Zhang, *RSC Adv.*, 2019, **9**, 15084-15091.
15. L. Xiao, T. Liu, M. Zhang, Q. Li and J. Yang, *ACS Sustain. Chem. Eng.*, 2018, **7**, 2483-2491.
16. B. Pandey, S. Rani and S. C. Roy, *J. Alloys Compd.*, 2020, **846**, 155881.
17. B. Gao, M. Sun, W. Ding, Z. Ding and W. Liu, *Appl. Catal. B Environ.*, 2021, **281**, 119492.
